# Supplementary material for: Preparation of DNA functional phosphorescent quantum dots and application in melamine detection in milk
Source: Royal Society of Chemistry journal article supplement (doi:10.1039/c9ra03919h), 2019-01-01
Supplement: c9ra03919h1.pdf [file c9ra03919h1.pdf]

1 **Supplementary Materials**  
2 **Preparation of DNA functional phosphorescent quantum**  
3 **dots and application into melamine detection in milk**

4 **Yanming Miao\*** **Ruirui Wang** **Xiaojie Sun** **Guiqin Yan**

5 **Table of contents:**

6 **Table S1** Comparison of different methods for the determination of melamine.

7 **Table S2** Effect of co-existing substances on the RTP intensity of 20  $\mu\text{M}$  melamine.

8 **Table S3** The results of spiked recovery test.

9

---

*Shanxi Normal University, Linfen 041004, PR China. E-mail: mym8207@126.com;*

*Tel.: (86) 357-2051249; Fax.: (86) 357-2051243.*

10 **Table S1** Comparison of different methods for the determination of melamine.

| Probe                         | Method               | Linear range       | Detection limit | Reference        |
|-------------------------------|----------------------|--------------------|-----------------|------------------|
| DNA–Ag NCs <sup>a</sup>       | Fluorescence         | 0.05-7 $\mu$ M     | 0.01 $\mu$ M    | 1                |
| Ag NCs <sup>b</sup>           | Fluorescence         | 0.1-30 $\mu$ M     | 0.03 $\mu$ M    | 2                |
| Au NPs <sup>c</sup>           | Fluorescence         | 0.05-0.5 $\mu$ M   | 0.04 $\mu$ M    | 3                |
| Au NCs <sup>d</sup>           | Fluorescence         | 0.5-10 $\mu$ M     | 0.14 $\mu$ M    | 4                |
| CdTe QDs <sup>e</sup>         | Fluorescence         | 0.79-9.5 $\mu$ M   | 0.31 $\mu$ M    | 5                |
| CdS QDs                       | Fluorescence         | 2 nM-50 $\mu$ M    | 1 $\mu$ M       | 6                |
| DNA (P <sub>3</sub> )         | CVG-AFS <sup>f</sup> | 1 nM-10 $\mu$ M    | 0.2 nM          | 7                |
| DNA (P <sub>4</sub> )         | CVG-AFS              | 0.1 nM-1 $\mu$ M   | 0.02 nM         | 7                |
| T <sub>36</sub> DNA           | Visualization        | 0.5-100 $\mu$ M    | 0.08 $\mu$ M    | 8                |
| -                             | HPLC <sup>g</sup>    | 39.6-317.2 $\mu$ M | 0.79 $\mu$ M    | 9                |
| -                             | SERS <sup>h</sup>    | 2.5-39.6 $\mu$ M   | 1.34 $\mu$ M    | 10               |
| G-quadruplex-NMM <sup>i</sup> | Fluorescence         | 0.1-100 nM         | 0.08 nM         | 11               |
| ssDNA-PQDs                    | Phosphorescence      | 0.005-6 mM         | 0.0016 mM       | <b>This work</b> |

11 <sup>a</sup>DNA–Ag NCs: Oligonucleotide-stabilized silver nanoclusters; <sup>b</sup>Ag NCs: Ag nanoclusters; <sup>c</sup>Au

12 NPs: Gold nanoparticles; <sup>d</sup>Au NCs: BSA-stabilized gold nanoclusters; <sup>e</sup>QDs: Quantum dots;

13 <sup>f</sup>CVG-AFS: Chemical vapour generation coupled with atomic fluorescence spectrometry; <sup>g</sup>HPLC:

14 High performance liquid chromatography; <sup>h</sup>SERS: Surface enhanced raman scattering; <sup>i</sup>G -

15 quadruplex-NMM: N-methyl mesoporphyrin IX (NMM) and K<sup>+</sup> to form G-quadruplex-NMM

16 complex.

17

18 **Table S2** Effect of co-existing substances on the RTP intensity of 20  $\mu$ M melamine.

| Co-existing substance | [Co-existing substance] /<br>[Melamine] | Change of the RTP<br>Intensity (%) |
|-----------------------|-----------------------------------------|------------------------------------|
| K <sup>+</sup>        | 150                                     | -2.2                               |
| Na <sup>+</sup>       | 2500                                    | +1.7                               |
| Mg <sup>2+</sup>      | 100                                     | -3.3                               |
| Ca <sup>2+</sup>      | 20                                      | +3.4                               |
| Zn <sup>2+</sup>      | 10                                      | +3.9                               |
| Hg <sup>2+</sup>      | 0.001                                   | -5.6                               |
| Ag <sup>+</sup>       | 0.01                                    | -6.1                               |
| Cu <sup>2+</sup>      | 0.01                                    | -5.3                               |
| Pb <sup>2+</sup>      | 0.08                                    | +3.1                               |
| Co <sup>2+</sup>      | 0.05                                    | +2.1                               |
| Glc                   | 100                                     | -1.5                               |
| L-Ala                 | 12                                      | +1.9                               |
| L-Lys                 | 5                                       | -1.1                               |
| L-Tyr                 | 2                                       | +2.5                               |
| L-Glu                 | 10                                      | -1.1                               |

19

21 **Table S3** The results of spiked recovery test.

| Sample              | Added<br>( $\mu\text{M}$ ) | Found<br>( $\mu\text{M}$ ) | Recovery<br>(%, n=5) | RSD<br>(%) |
|---------------------|----------------------------|----------------------------|----------------------|------------|
| Pure milk-Melamine1 | 10                         | 9.8                        | 98                   | 4.1        |
| Pure milk-Melamine2 | 50                         | 52.6                       | 105.2                | 5.7        |
| Pure milk-Melamine3 | 100                        | 98.3                       | 98.3                 | 3.3        |

- 22 1. H. Shuang, S. Zhu, Z. Liu, L. Hu, S. Parveen and G. Xu, *Biosens. Bioelectron.*, 2012, **36**, 267-  
23 270.
- 24 2. Q. Du, Q. Fei, B. Mao, S. Zhu and J. You, *New J. Chem.*, 2016, **40**, 8459-8464.
- 25 3. M. Zhang, X. Cao, H. Li, F. Guan, J. Guo, F. Shen, Y. Luo, C. Sun and L. Zhang, *Food Chem.*,  
26 2012, **135**, 1894-1900.
- 27 4. H. Dai, Y. Shi, Y. Wang, Y. Sun, J. Hu, P. Ni and Z. Li, *Biosens. Bioelectron.*, 2014, **53**, 76-  
28 81.
- 29 5. H. Dai, S. Yan, Y. Wang, Y. Sun, J. Hu, P. Ni and L. Zhuang, *Sens. Actuators, B*, 2014, **202**,  
30 201-208.
- 31 6. G. L. Wang, H. J. Jiao, X. Y. Zhu, Y. M. Dong and Z. J. Li, *Talanta*, 2012, **93**, 398-403.
- 32 7. P. Chen, P. Yang, R. Zhou, X. Yang, J. Chen and X. Hou, *Chem. Commun.*, 2018, **54**, 4696-  
33 4699.
- 34 8. H. Hu, J. Zhang, Y. Ding, X. Zhang, K. Xu, X. Hou and P. Wu, *Anal. Chem.*, 2017, **89**, 5101-  
35 5106.
- 36 9. G. Venkatasami and J. Sowa, *Anal. Chim. Acta*, 2010, **665**, 227-230.
- 37 10. A. Giovannozzi, F. Rolle, M. Sega, M. Abete, D. Marchis and A. Rossi, *Food Chem.*, 2014,  
38 **159**, 250-256.
- 39 11. R. Dai, X. Wang, Z. Wang, S. Mu, J. Liao, Y. Wen, J. Lv, K. Huang and X. Xiong,  
40 *Microchem. J.*, 2019, **146**, 292-299.
